# Supplementary material for: Inverse regulation of Vibrio cholerae biofilm dispersal by polyamine signals
Source: eLife. 2021 Apr 15;10:e65487. doi: 10.7554/eLife.65487 (PMC8079147; doi:10.7554/eLife.65487)
Supplement: Supplementary file 1. [file elife-65487-supp1.xlsx]

## Sheet: Sheet1
Supplementary File 1. C-di-GMP Reporter Output Averages and Standard Deviations.
Wild Type (Fig. 3C)
		Relative Reporter Output (%)								Standard Deviation
Spd (µM)	1000	-23.9545	-20.8138	-9.83097	22.5729	30.6739	26.7632		1000	3.64668	3.24197	6.50434	3.79351	2.85914	4.32852
	100	-15.6022	-20.0359	-12.4218	51.937	54.4931	38.0858		100	4.06848	4.15166	4.09621	3.16468	3.01112	4.01842
	50	-16.4777	-21.1014	-15.0693	56.2832	54.4021	38.0727		50	4.58459	4.12483	6.33557	2.85477	3.86464	3.05347
	10	-15.0021	-22.5906	-16.7564	57.8049	57.8848	35.3585		10	6.08063	3.96144	3.13355	3.07535	5.02349	3.17696
	1	5.90548	-6.12417	-6.20945	59.2785	55.4442	38.6664		1	4.6275	4.74466	3.42906	5.14564	3.5244	2.92127
	0	0	-2.28109	-0.101596	54.8428	53.1357	37.7006		0	3.95835	4.49285	4.01197	2.83914	3.53757	3.22535
		0	1	10	50	100	1000			0	1	10	50	100	1000
		Nspd (µM)								Nspd (µM)
ΔmbaA (Fig. 3E)
		Relative reporter output								Standard Deviation
Spd (µM)	1000	4.90915	5.22355	5.22615	4.25087	5.21428	8.0635		1000	3.58427	2.83806	2.92939	4.00124	2.88797	5.23603
	100	5.63599	6.44137	7.29872	5.06134	5.29594	5.36738		100	2.83989	4.01752	3.35373	3.46149	3.10651	6.6515
	50	10.8082	8.95595	11.6624	11.8717	12.3392	6.92018		50	3.32299	3.77639	3.26141	5.92849	4.52829	6.27263
	10	12.2292	16.4607	15.4196	14.0235	12.1326	10.6035		10	4.35107	3.50561	3.69504	6.95178	4.9811	7.31854
	1	16.5036	16.9914	21.894	18.3522	17.741	11.081		1	2.93189	3.17674	4.36754	3.41712	6.5271	4.43561
	0	14.6454	19.9241	22.8783	15.5724	16.441	13.0066		0	3.4428	3.61334	3.16118	3.14778	3.19163	3.45898
		0	1	10	50	100	1000			0	1	10	50	100	1000
		Nspd (µM)								Nspd (µM)
ΔnspS (Fig. 3F)
		Relative reporter output								Standard Deviation
Spd (µM)	1000	-22.0604	-21.4752	-21.3561	-21.8288	-24.8466	-25.167		1000	5.0228	6.19173	2.9167	2.87518	2.9386	3.07764
	100	-15.0351	-15.4641	-17.7669	-21.5982	-18.2517	-25.0101		100	3.77871	2.93824	4.48087	6.90173	5.28705	5.26667
	50	-13.7041	-17.6009	-16.5365	-21.2985	-20.7858	-24.3842		50	4.16568	4.4491	3.71571	6.25192	7.60389	6.94146
	10	-13.9328	-14.79	-14.7043	-17.8969	-20.5376	-22.1013		10	5.89993	3.3964	3.89941	4.54137	5.71119	6.91539
	1	-12.5576	-10.4542	-11.2823	-19.1323	-19.4023	-23.3799		1	3.41335	4.52521	3.03576	4.30061	2.80698	6.6488
	0	-9.42993	-6.94499	-12.477	-14.3088	-16.9627	-22.1703		0	3.76411	3.36564	2.94612	7.39208	3.12683	3.11947
		0	1	10	50	100	1000			0	1	10	50	100	1000
		Nspd (µM)								Nspd (µM)
mbaAEVL* (Fig. 4C)
		Relative reporter output								Standard Deviation
Spd (µM)	1000	5.86637	7.9005	10.0252	18.0756	16.3171	12.469		1000	4.73764	3.39692	3.03736	3.86183	3.78054	3.20549
	100	16.7016	15.5408	18.2969	32.568	32.3929	23.1946		100	4.41485	4.33334	3.61663	3.59879	3.46907	7.41709
	50	16.1772	18.1309	21.615	36.1393	34.8553	19.135		50	3.02487	3.39386	3.17178	3.54554	3.79212	7.00061
	10	20.6844	20.1105	21.9341	37.1861	33.5212	25.036		10	2.9533	3.64862	2.98815	2.86929	4.72159	7.24241
	1	24.3194	22.3569	24.9477	39.3973	34.7021	22.6227		1	3.02276	3.10837	3.6868	2.91062	3.0167	5.31022
	0	19.3051	22.6168	26.3477	37.3213	32.7825	23.6414		0	3.35493	3.51679	3.91406	3.60884	3.19928	3.83353
		0	1	10	50	100	1000			0	1	10	50	100	1000
		Nspd (µM)								Nspd (µM)
mbaASGDEF* (Fig. 4E)
		Relative reporter output								Standard Deviation
Spd (µM)	1000	-3.59991	-1.47531	-2.31308	-1.72686	-2.0073	-3.22233		1000	3.96104	3.37867	3.63465	4.45736	3.0789	5.53696
	100	7.01581	7.97697	7.05589	7.50083	5.76669	0.320226		100	6.47661	5.68856	4.69876	3.65418	3.38546	5.4193
	50	5.39737	6.55246	9.96127	8.46457	6.26182	1.52022		50	3.22291	4.51734	3.01461	3.00754	2.81827	4.48014
	10	8.09234	8.6836	8.65707	9.0825	6.2641	1.08908		10	4.18686	6.42279	3.20742	3.44761	4.35367	3.71839
	1	8.85027	9.81914	8.87708	7.71752	5.49007	1.25308		1	3.40268	4.17879	2.91973	3.25253	3.13387	4.91608
	0	9.12163	11.1453	11.1079	6.56936	7.83108	0.796176		0	3.33684	3.25531	6.31037	2.81051	4.51343	4.09231
		0	1	10	50	100	1000			0	1	10	50	100	1000
		Nspd (µM)								Nspd (µM)
ΔpotD1 (Fig. 5B)
		Relative reporter output								Standard Deviation
Spd (µM)	1000	-37.3086	-21.2517	6.28073	20.9897	22.6712	18.8049		1000	9.71199	5.69273	4.48697	5.89801	4.09106	5.64824
	100	15.7275	28.4716	36.0472	43.8451	46.0668	30.5047		100	3.49789	3.06208	3.81491	10.7467	11.0391	10.9687
	50	24.6538	35.3611	42.033	48.9246	47.4484	34.2516		50	3.06997	4.20021	4.02492	11.2249	10.6519	10.2476
	10	38.1607	43.7867	54.2683	50.8237	42.3965	31.8565		10	4.94513	8.94812	4.88402	3.22982	7.51992	5.6795
	1	46.8717	49.2148	47.4748	42.8085	53.1507	38.3424		1	4.76571	10.8816	9.98254	5.16525	6.51667	9.87284
	0	49.8096	51.3101	45.7886	51.3979	48.9851	29.7979		0	7.67107	8.69849	4.50256	7.43319	7.02832	4.15444
		0	1	10	50	100	1000			0	1	10	50	100	1000
		Nspd (µM)								Nspd (µM)
