# Supplementary figures and images for: Inverse regulation of Vibrio cholerae biofilm dispersal by polyamine signals
Source: eLife journal article supplement (doi:10.7554/elife.65487), 2021-04-15

**A**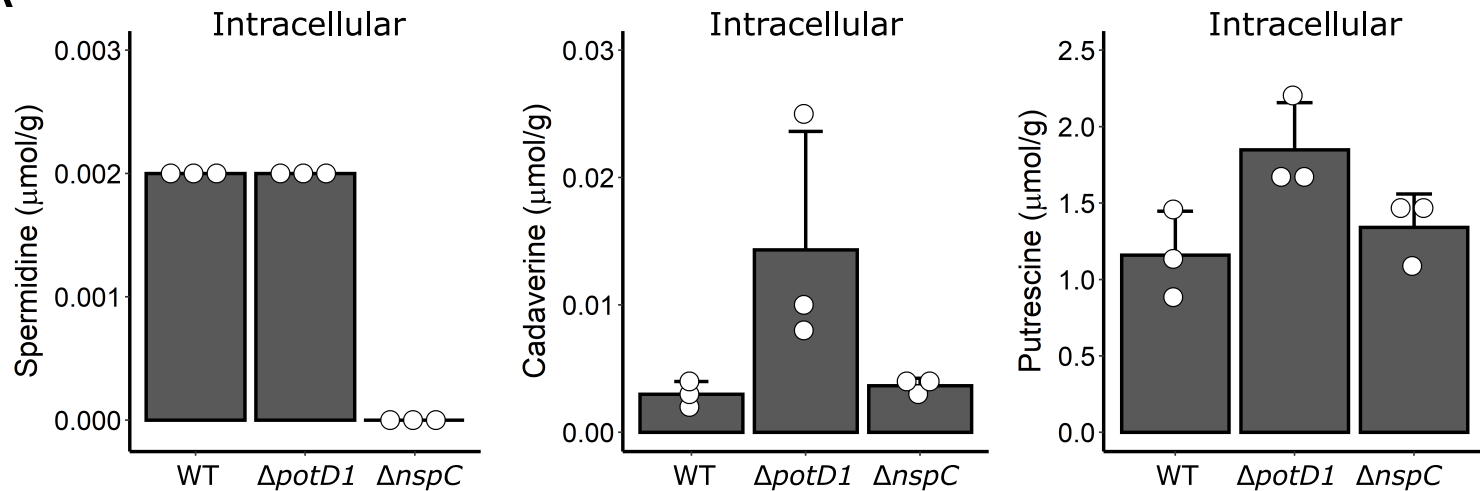**B**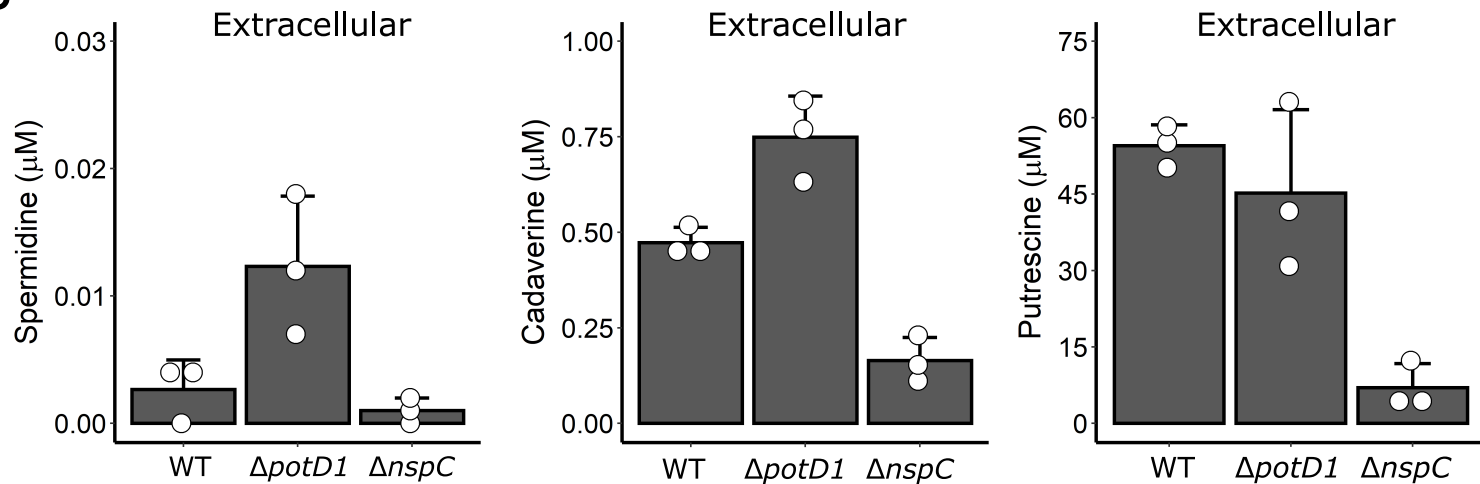

Supplement: supp [file elife-65487-supp-v1.zip]

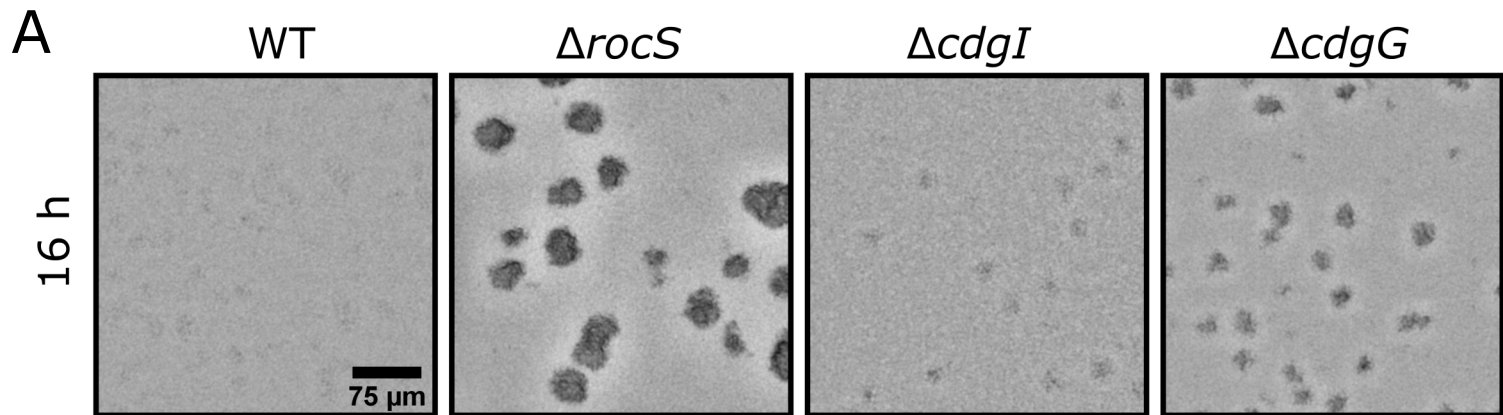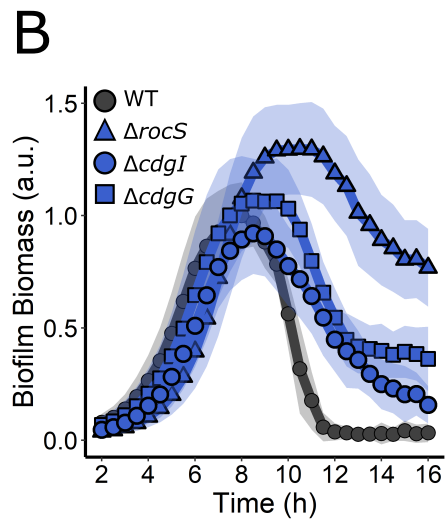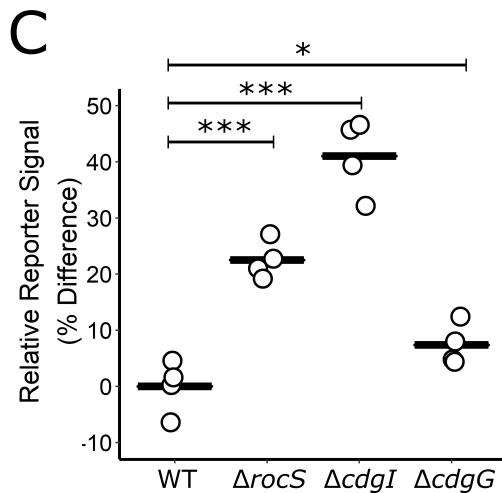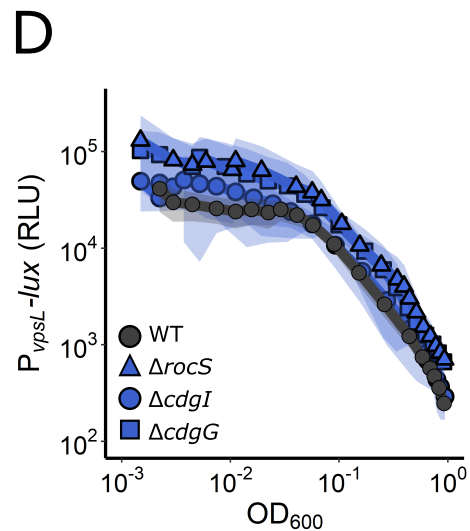

Supplement: supp [file elife-65487-supp-v1.zip]

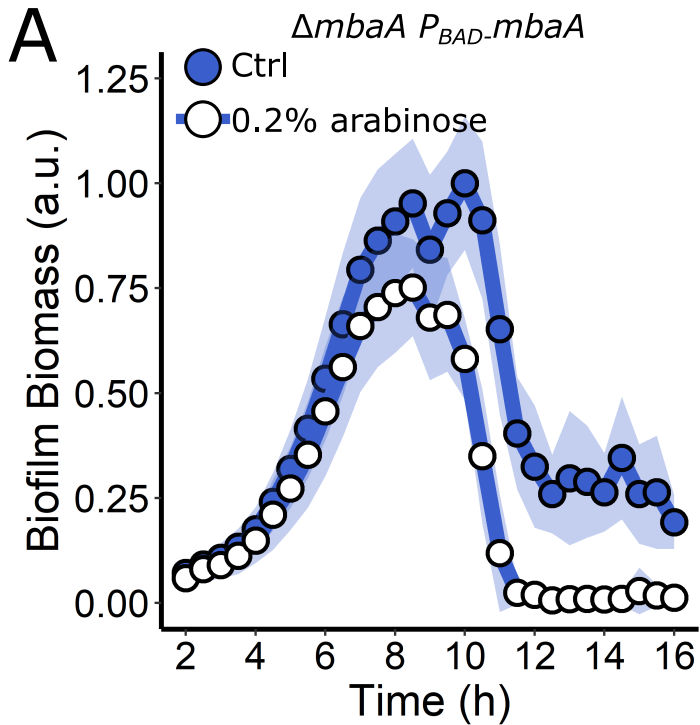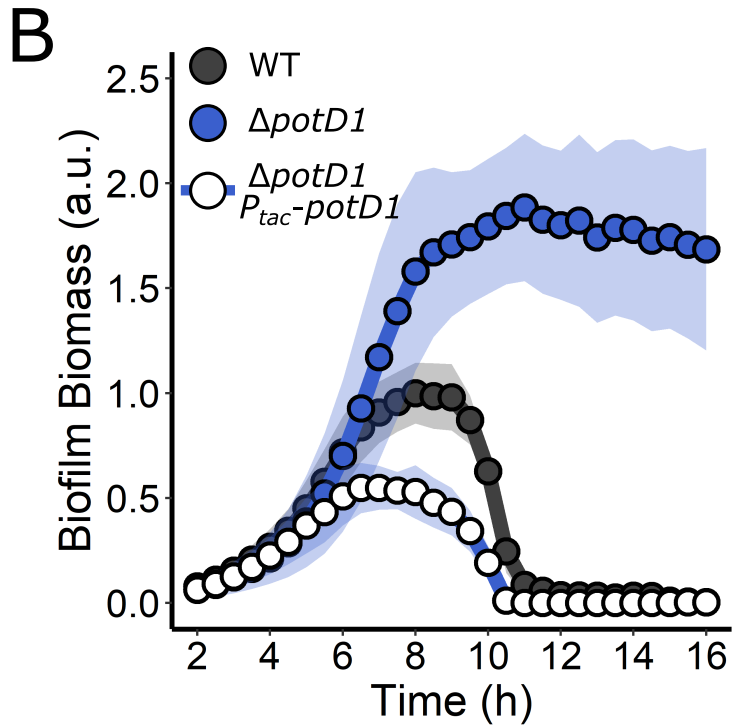

Supplement: supp [file elife-65487-supp-v1.zip]

**A**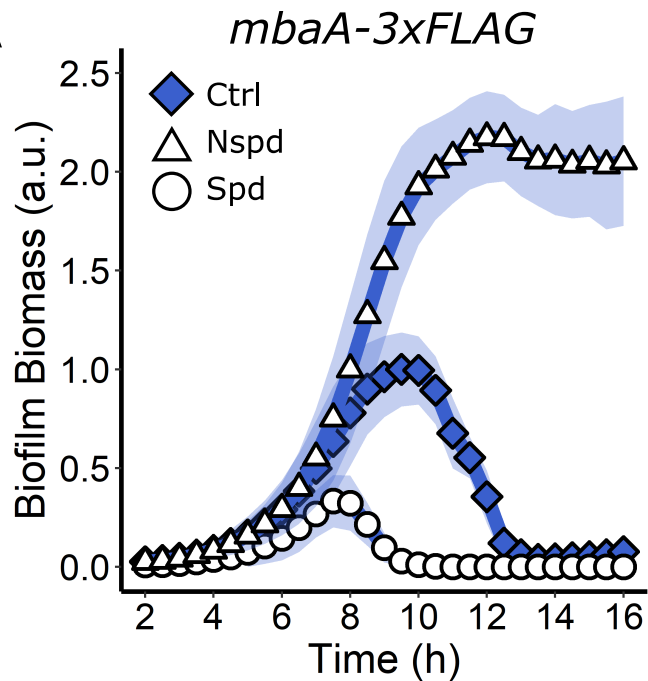**B**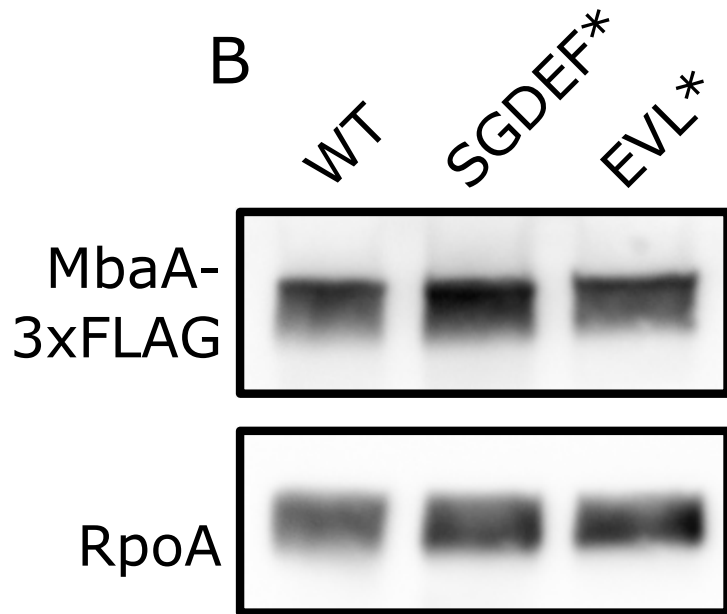

Supplement: supp [file elife-65487-supp-v1.zip]

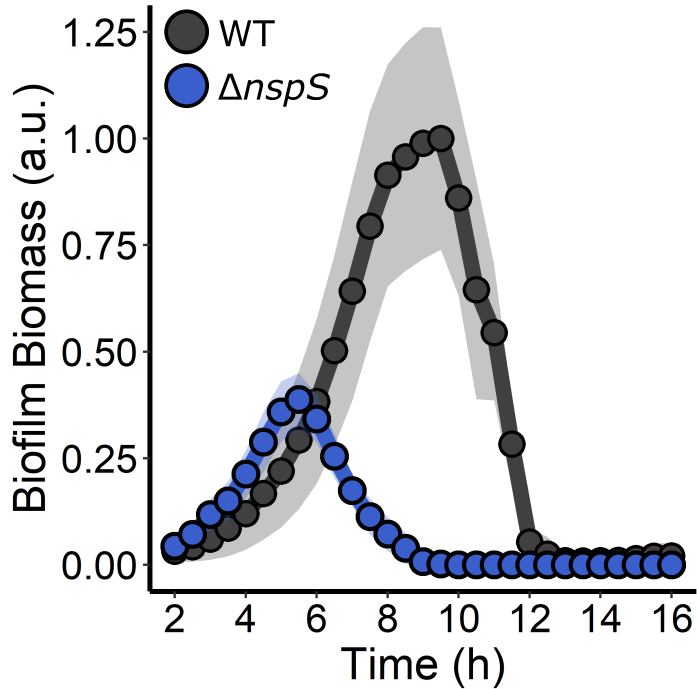

Supplement: supp [file elife-65487-supp-v1.zip]

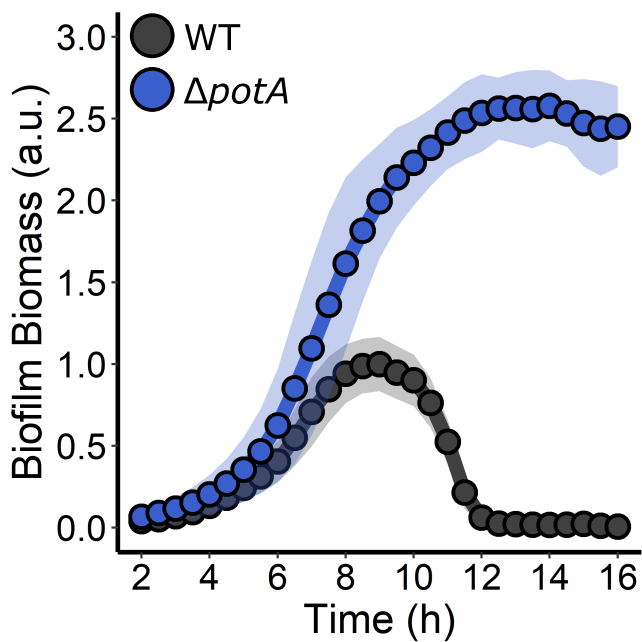

Supplement: supp [file elife-65487-supp-v1.zip]

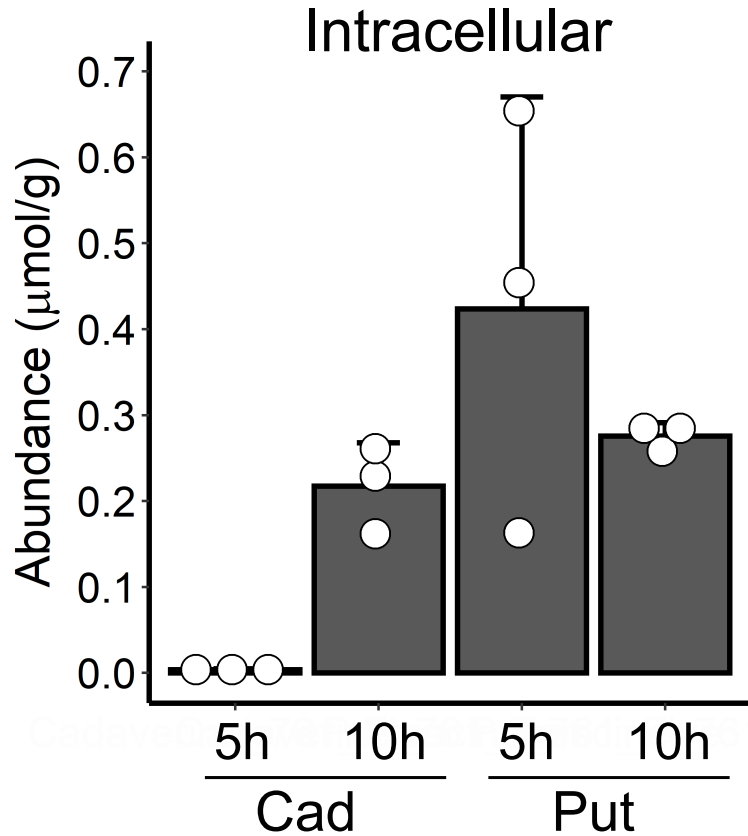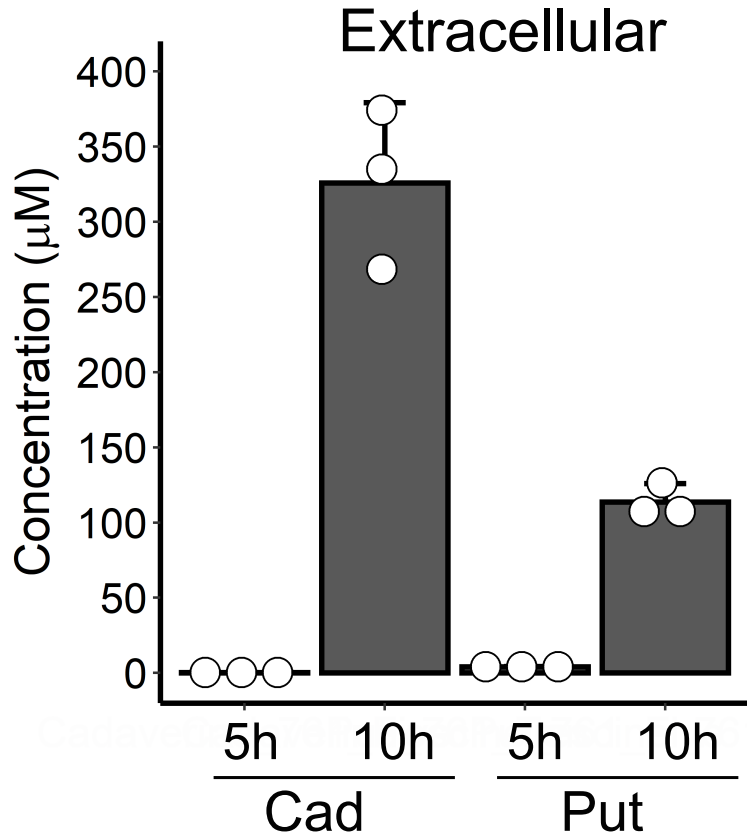

Supplement: supp [file elife-65487-supp-v1.zip]
